# Supplementary material for: Rapid chemical de-N-glycosylation and derivatization for liquid chromatography of immunoglobulin N-linked glycans
Source: PubMed Central journal article supplement (PMC5933716; doi:10.1371/journal.pone.0196800), 2018-05-03
Supplement: pone.0196800.s002.pdf [file pone.0196800.s002.pdf]

A

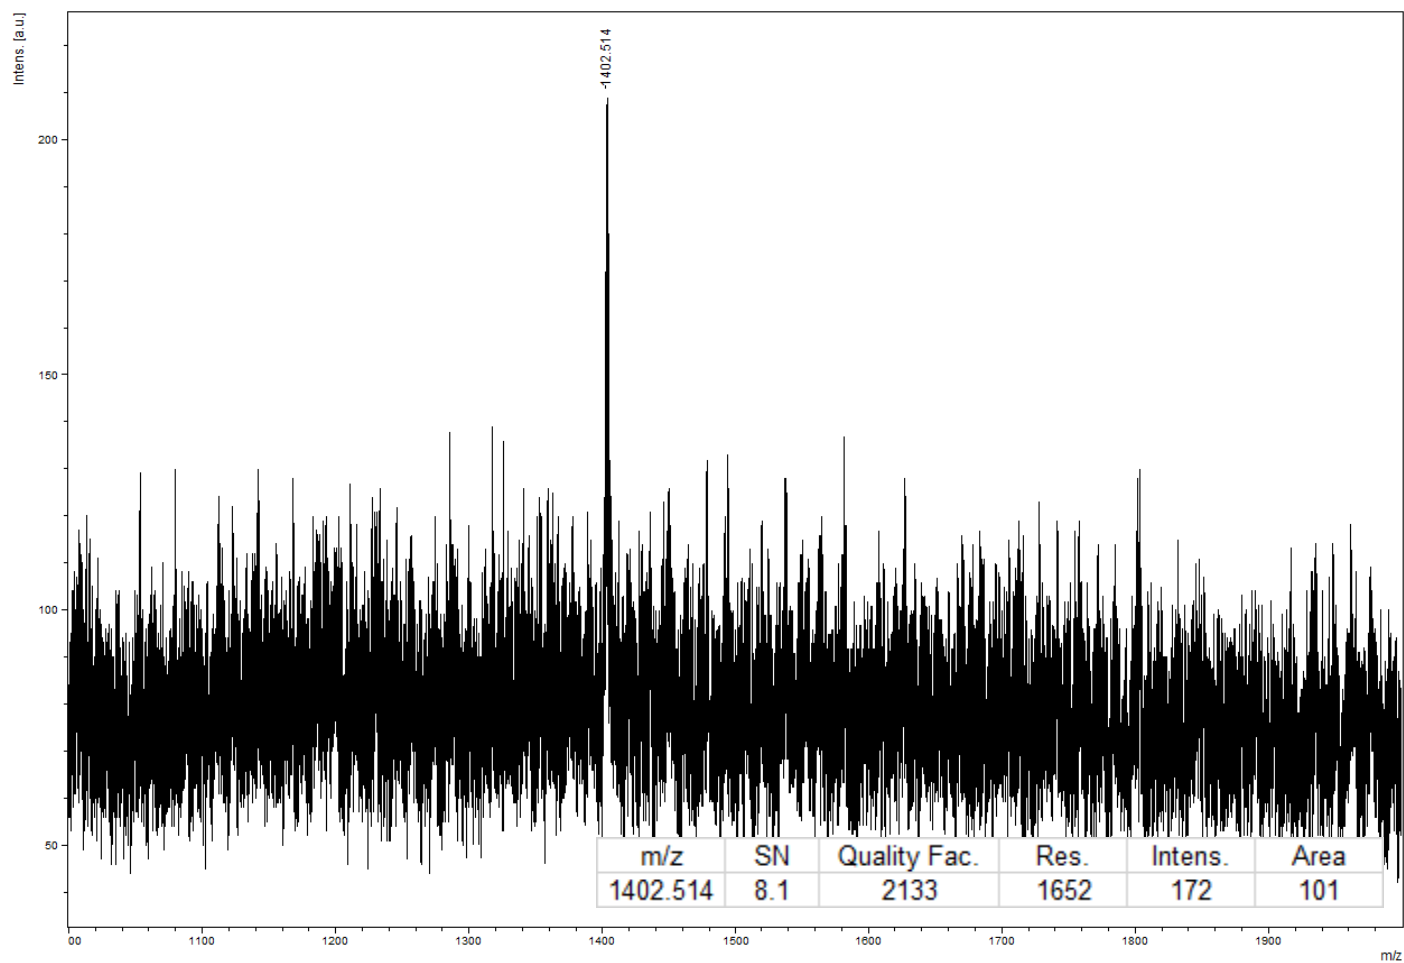

B

2.8.5.20090629ver.R04\_120615(S/N:U30014000002)

Data: 2018-02-21-LP110-CID165(1402)-peak10001.J15[c] 21 Feb 2018 11:59 Cal: 120817 6 Apr 2017 11:02 (CID of 1402.10)  
Shimadzu Biotech Axima QIT 2.9.1.20100121: Mode positive, Mid 750+, Power: 110  
%Int. 6.0 mV[sum= 3627 mV] Profiles 1-600 Unsmoothed

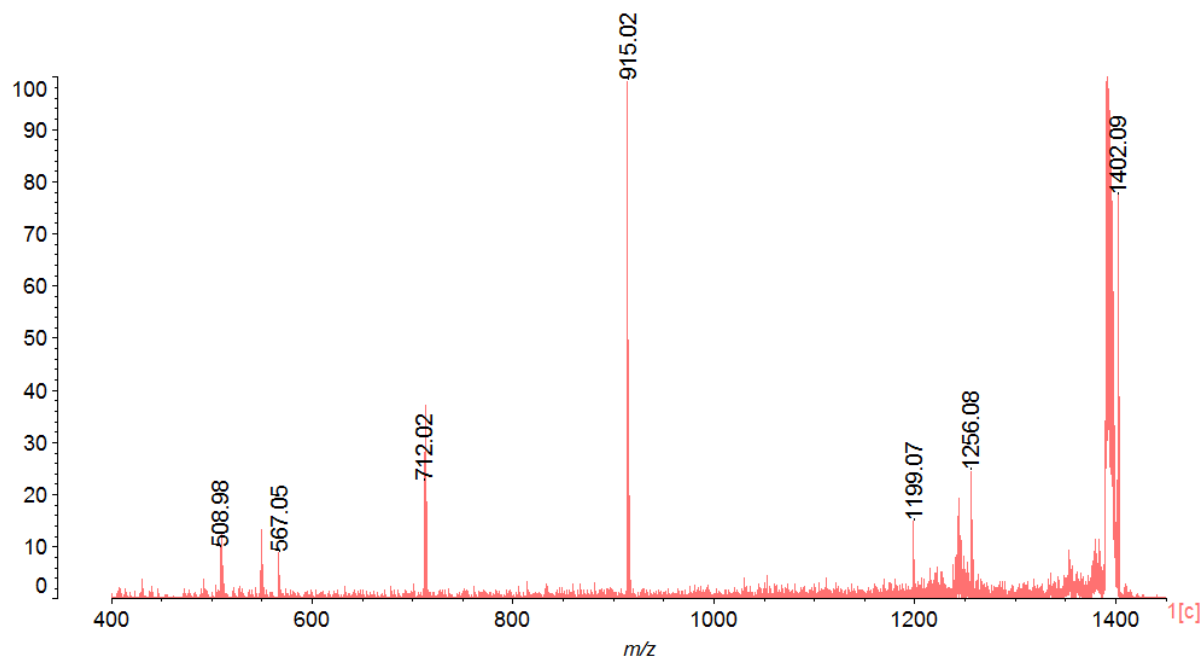

2.8.5.20090629ver.R04\_120615(S/N:U30014000002)

Data: 2018-02-21-LP110-CID165(1402)-peak10001.J15[c] 21 Feb 2018 11:59 Cal: 120817 6 Apr 2017 11:02 (CID of 1402.10)  
Shimadzu Biotech Axima QIT 2.9.1.20100121: Mode positive, Mid 750+, Power: 110

| Mass    | %Area  | %Total | Apex (mV) | Resolution | S / N | Flags |
|---------|--------|--------|-----------|------------|-------|-------|
| 508.98  | 8.44   | 3.32   | 0.58      | 0.00       | 0.00  | M     |
| 549.03  | 3.99   | 1.57   | 0.32      | 0.00       | 0.00  | M     |
| 567.05  | 4.23   | 1.67   | 0.52      | 0.00       | 0.00  | M     |
| 712.02  | 21.06  | 8.28   | 1.35      | 0.00       | 0.00  | M     |
| 915.02  | 87.41  | 34.38  | 5.99      | 0.00       | 0.00  | M     |
| 1199.07 | 8.29   | 3.26   | 0.89      | 0.00       | 0.00  | M     |
| 1256.08 | 20.84  | 8.20   | 1.47      | 0.00       | 0.00  | M     |
| 1402.09 | 100.00 | 39.33  | 4.67      | 0.00       | 0.00  | M     |
