# Supplementary material for: Rapid chemical de-N-glycosylation and derivatization for liquid chromatography of immunoglobulin N-linked glycans
Source: PubMed Central journal article supplement (PMC5933716; doi:10.1371/journal.pone.0196800), 2018-05-03
Supplement: pone.0196800.s003.pdf [file pone.0196800.s003.pdf]

A

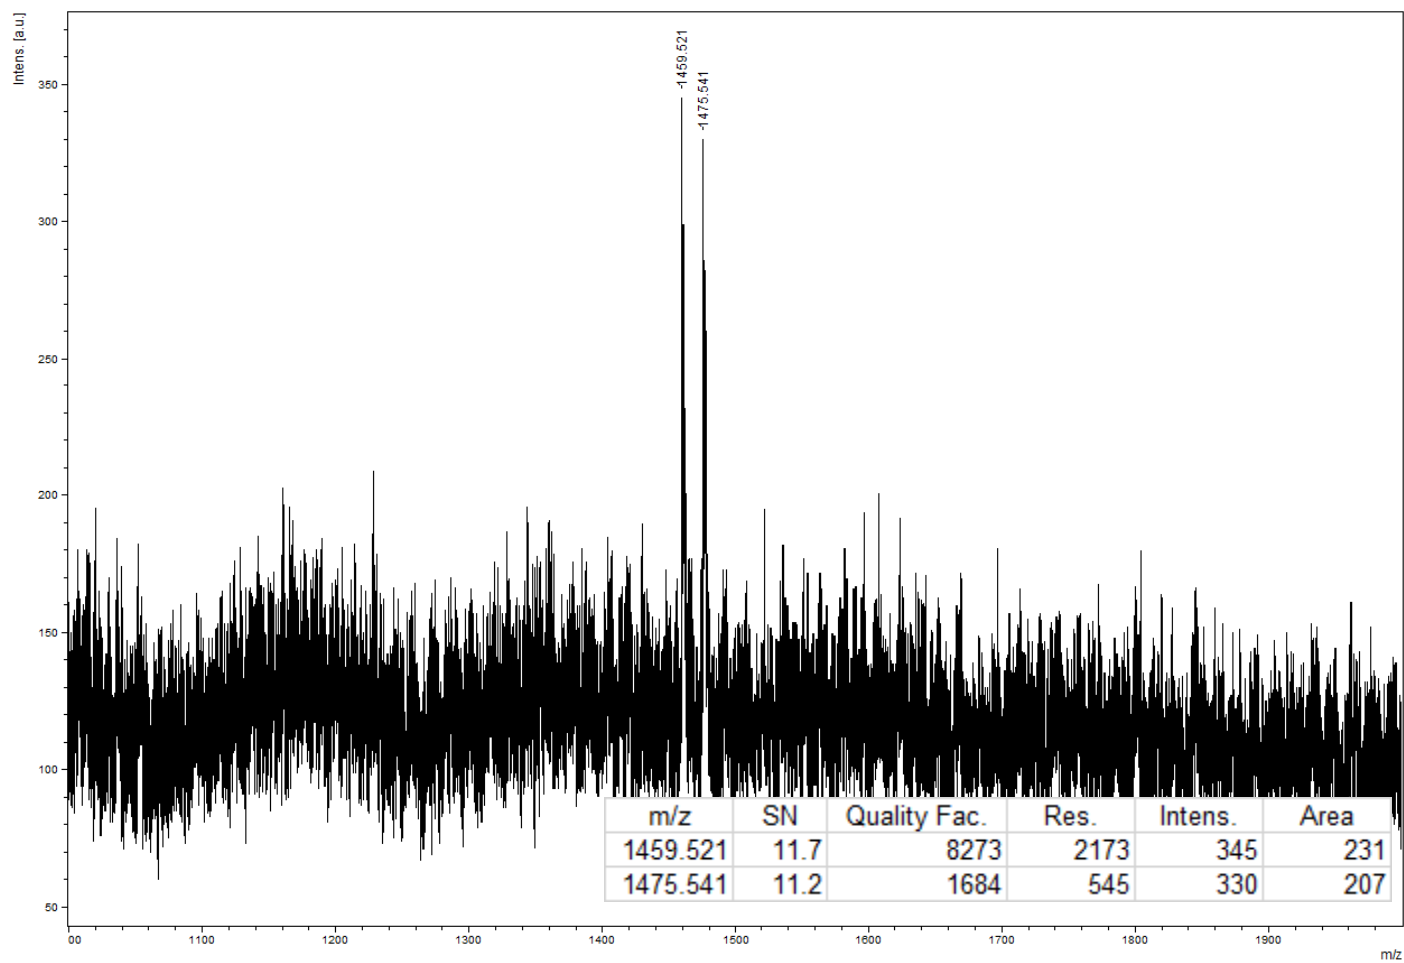

B

2.8.5.20090629ver.R04\_120615(S/N:U30014000002)

Data: 2018-02-21-LP110-CID165(1459)-peak20001.J16[c] 21 Feb 2018 12:08 Cal: 120817 6 Apr 2017 11:02 (CID of 1459.08)  
Shimadzu Biotech Axima QIT 2.9.1.20100121: Mode positive, Mid 750+, Power: 110  
%Int. 6.5 mV[sum= 3925 mV] Profiles 1-600 Unsmoothed

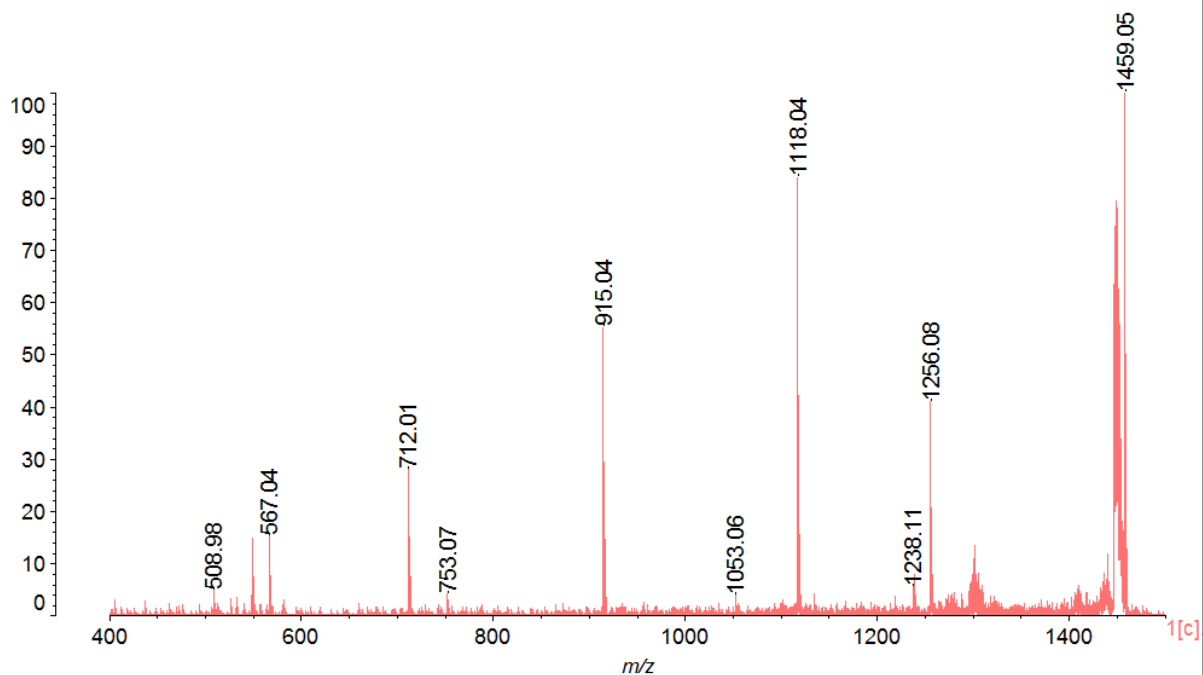

2.8.5.20090629ver.R04\_120615(S/N:U30014000002)

Data: 2018-02-21-LP110-CID165(1459)-peak20001.J16[c] 21 Feb 2018 12:08 Cal: 120817 6 Apr 2017 11:02 (CID of 1459.08)  
Shimadzu Biotech Axima QIT 2.9.1.20100121: Mode positive, Mid 750+, Power: 110

| Mass    | %Area  | %Total | Apex (mV) | Resolution | S / N | Flags |
|---------|--------|--------|-----------|------------|-------|-------|
| 508.98  | 4.10   | 1.43   | 0.31      | 0.00       | 0.00  | M     |
| 550.00  | 14.21  | 4.94   | 0.97      | 0.00       | 0.00  | M     |
| 567.04  | 12.77  | 4.44   | 0.99      | 0.00       | 0.00  | M     |
| 712.01  | 27.87  | 9.69   | 1.82      | 0.00       | 0.00  | M     |
| 753.07  | 4.13   | 1.44   | 0.26      | 0.00       | 0.00  | M     |
| 915.04  | 53.64  | 18.64  | 3.61      | 0.00       | 0.00  | M     |
| 1053.06 | 4.60   | 1.60   | 0.25      | 0.00       | 0.00  | M     |
| 1118.04 | 100.00 | 34.75  | 5.48      | 0.00       | 0.00  | M     |
| 1238.11 | 5.12   | 1.78   | 0.35      | 0.00       | 0.00  | M     |
| 1256.08 | 52.57  | 18.27  | 2.68      | 0.00       | 0.00  | M     |
| 1459.05 | 8.72   | 3.03   | 6.54      | 0.00       | 0.00  | M     |
