# Supplementary material for: Rapid chemical de-N-glycosylation and derivatization for liquid chromatography of immunoglobulin N-linked glycans
Source: PubMed Central journal article supplement (PMC5933716; doi:10.1371/journal.pone.0196800), 2018-05-03
Supplement: pone.0196800.s004.pdf [file pone.0196800.s004.pdf]

A

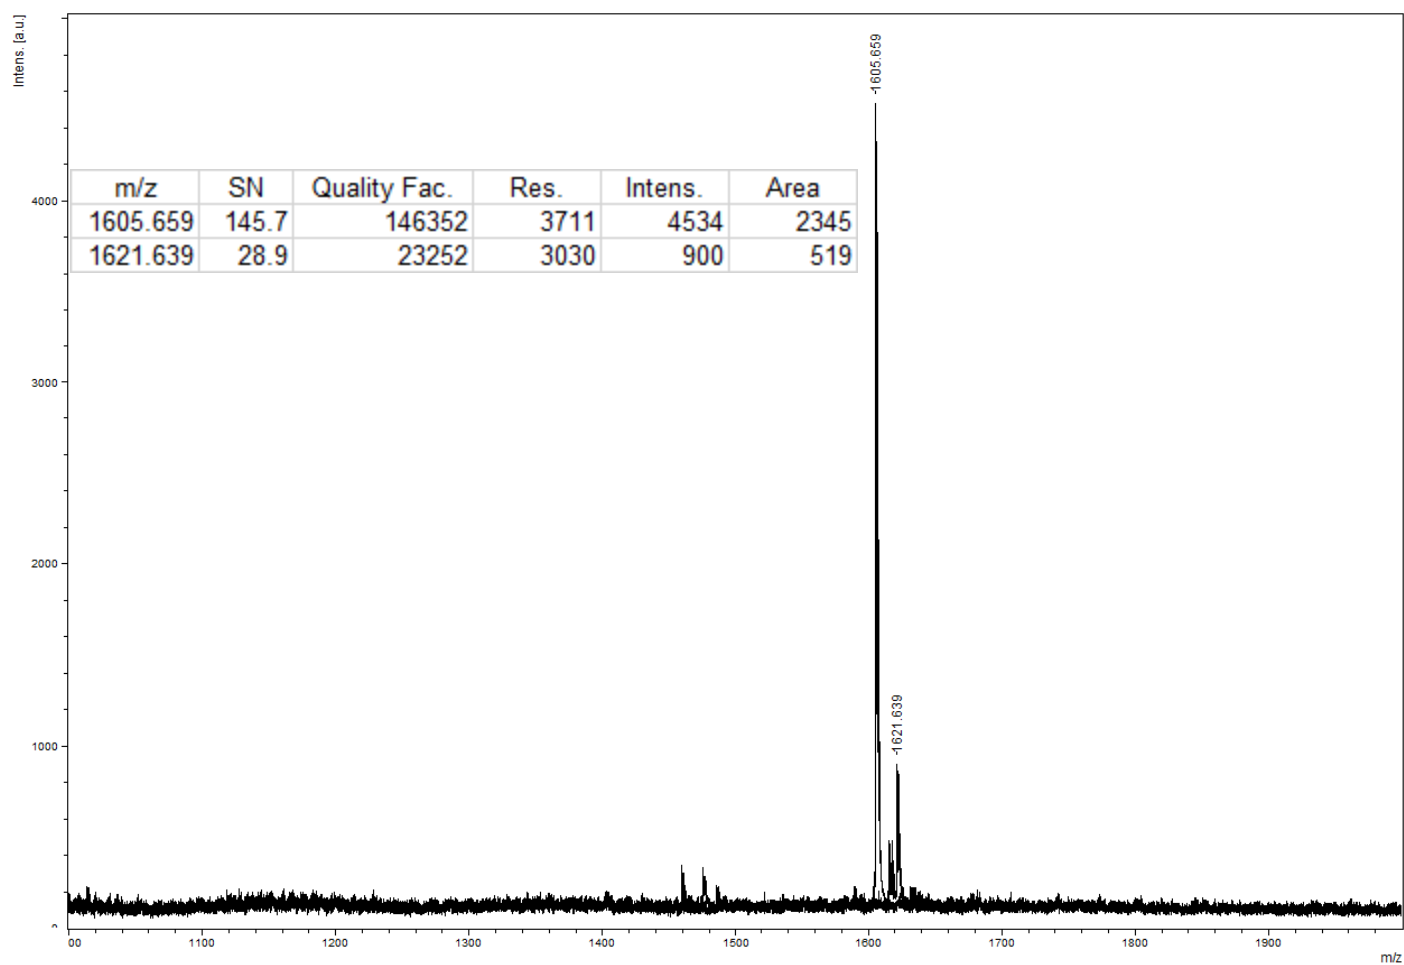

B

2.8.5.20090629ver.R04\_120615(S/N:U30014000002)

Data: 2018-0219-LP96-CID156(1605)0001.D15[c] 19 Feb 2018 14:56 Cal: 120817 6 Apr 2017 11:02 (CID of 1605.05)  
Shimadzu Biotech Axima QIT 2.9.1.20100121: Mode positive, Mid 750+, Power: 96  
%Int. 41 mV[sum= 24533 mV] Profiles 1-600 Unsmoothed

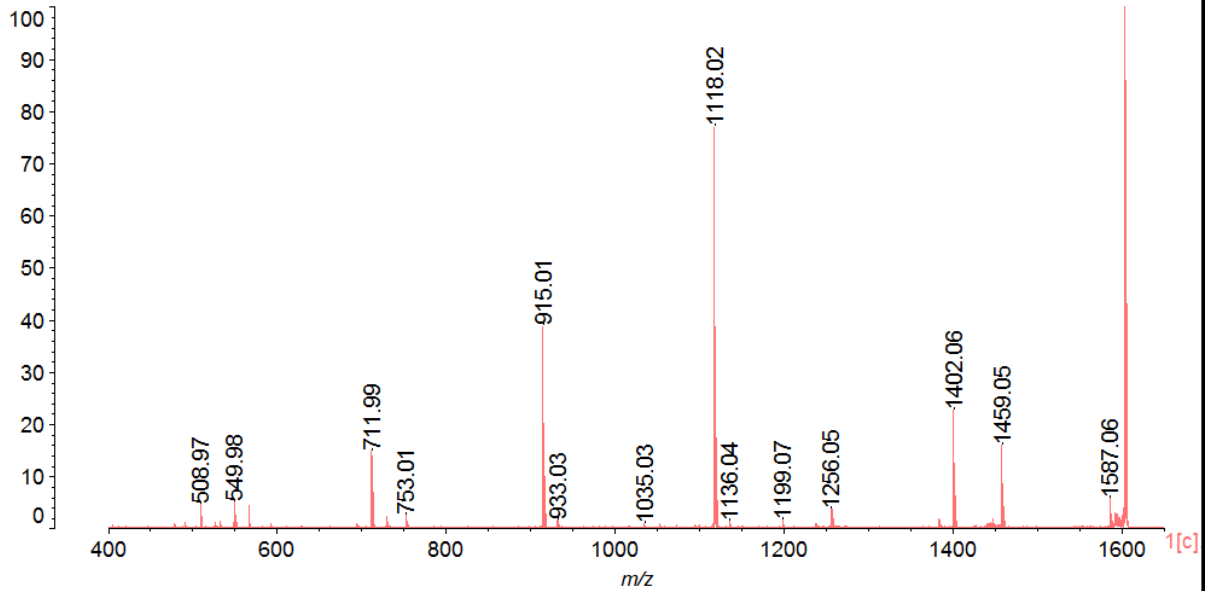

2.8.5.20090629ver.R04\_120615(S/N:U30014000002)

Data: 2018-0219-LP96-CID156(1605)0001.D15[c] 19 Feb 2018 14:56 Cal: 120817 6 Apr 2017 11:02 (CID of 1605.05)  
Shimadzu Biotech Axima QIT 2.9.1.20100121: Mode positive, Mid 750+, Power: 96

| Mass    | %Area  | %Total | Apex (mV) | Resolution | S / N | Flags |
|---------|--------|--------|-----------|------------|-------|-------|
| 508.97  | 4.68   | 1.84   | 1.88      | 0.00       | 0.00  | M     |
| 531.98  | 1.24   | 0.49   | 0.50      | 0.00       | 0.00  | M     |
| 549.98  | 5.06   | 1.99   | 2.01      | 0.00       | 0.00  | M     |
| 567.03  | 4.44   | 1.75   | 1.79      | 0.00       | 0.00  | M     |
| 711.99  | 17.50  | 6.90   | 6.05      | 0.00       | 0.00  | M     |
| 729.99  | 1.74   | 0.68   | 0.89      | 0.00       | 0.00  | M     |
| 753.01  | 2.74   | 1.08   | 1.01      | 0.00       | 0.00  | M     |
| 915.01  | 45.53  | 17.94  | 15.82     | 0.00       | 0.00  | M     |
| 933.03  | 1.82   | 0.72   | 0.59      | 0.00       | 0.00  | M     |
| 1035.03 | 0.84   | 0.33   | 0.31      | 0.00       | 0.00  | M     |
| 1118.02 | 100.00 | 39.40  | 31.43     | 0.00       | 0.00  | M     |
| 1136.04 | 1.47   | 0.58   | 0.50      | 0.00       | 0.00  | M     |
| 1199.07 | 2.24   | 0.88   | 0.66      | 0.00       | 0.00  | M     |
| 1238.99 | 0.73   | 0.29   | 0.34      | 0.00       | 0.00  | M     |
| 1256.05 | 3.76   | 1.48   | 1.45      | 0.00       | 0.00  | M     |
| 1384.03 | 2.54   | 1.00   | 0.69      | 0.00       | 0.00  | M     |
| 1402.06 | 29.44  | 11.60  | 9.21      | 0.00       | 0.00  | M     |
| 1459.05 | 22.13  | 8.72   | 6.49      | 0.00       | 0.00  | M     |
| 1587.06 | 5.92   | 2.33   | 2.35      | 0.00       | 0.00  | M     |
