# Supplementary material for: Rapid chemical de-N-glycosylation and derivatization for liquid chromatography of immunoglobulin N-linked glycans
Source: PubMed Central journal article supplement (PMC5933716; doi:10.1371/journal.pone.0196800), 2018-05-03
Supplement: pone.0196800.s005.pdf [file pone.0196800.s005.pdf]

A

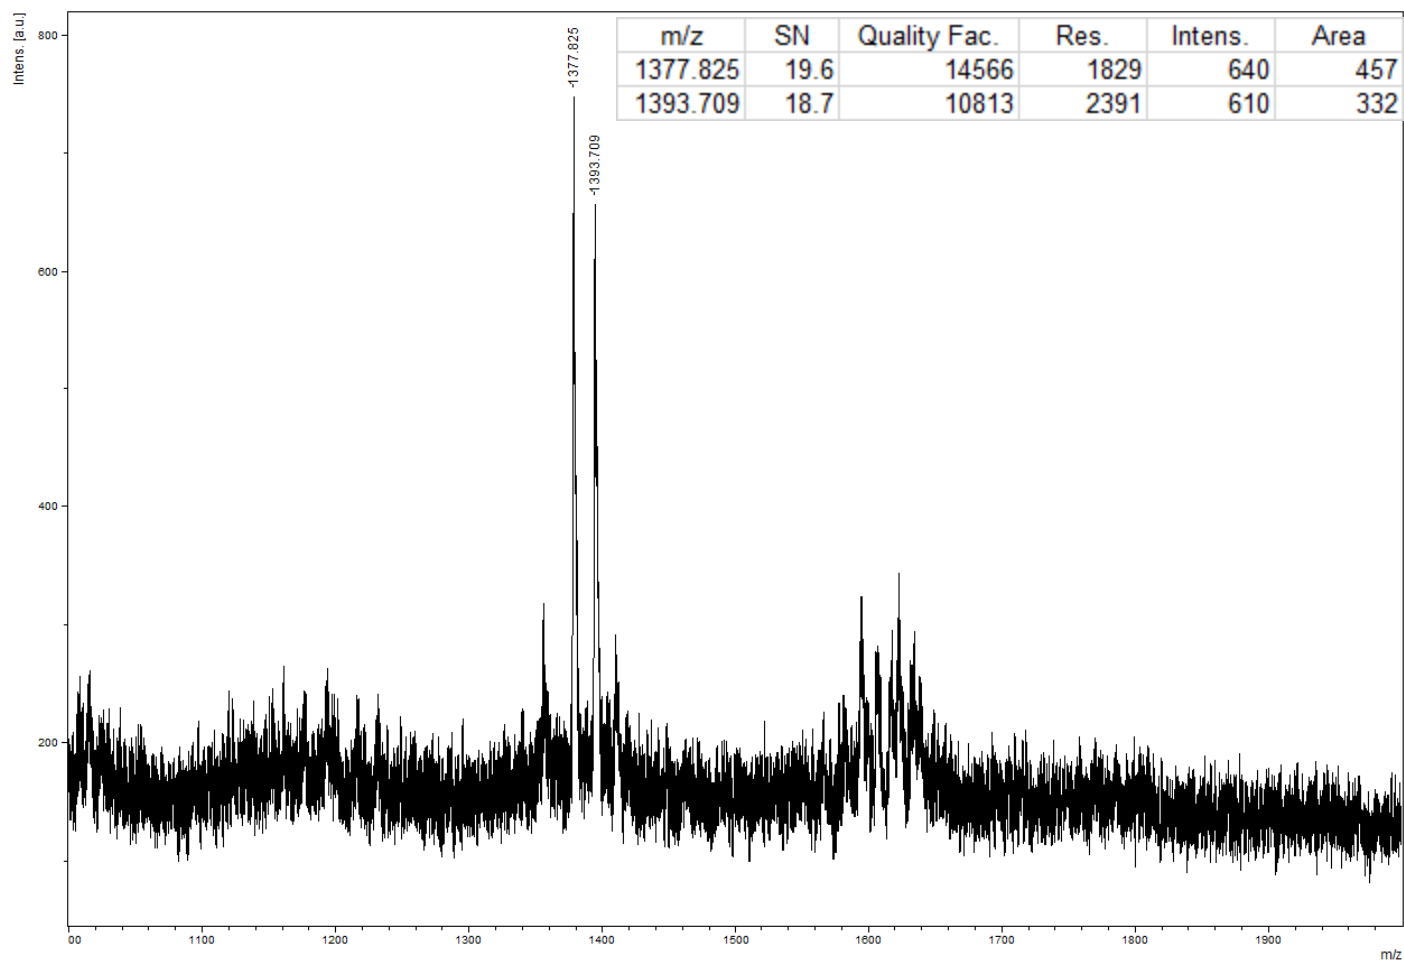

B

2.8.5.20090629ver.R04\_120615(S/N:U30014000002)

Data: 2018-02-21-LP110-CID180(1377)-peak40001.K15[c] 21 Feb 2018 11:48 Cal: 120817 6 Apr 2017 11:02 (CID of 1376.96)  
Shimadzu Biotech Axima QIT 2.9.1.20100121: Mode positive, Mid 750+, Power: 110  
%Int. 6.7 mV[sum= 4024 mV] Profiles 1-600 Unsmoothed

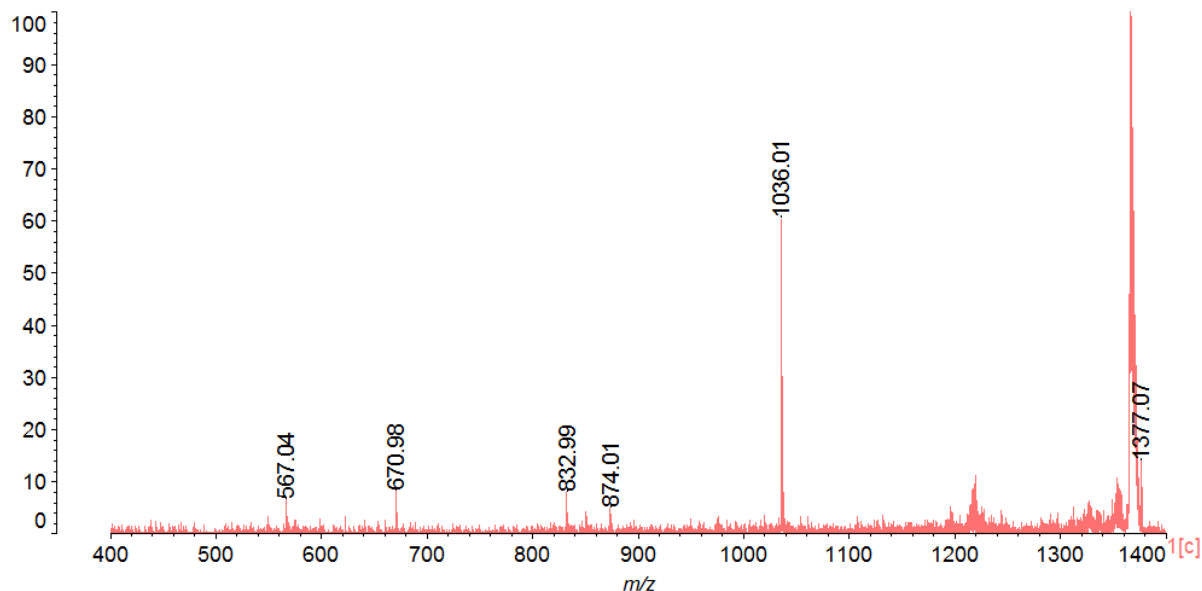

2.8.5.20090629ver.R04\_120615(S/N:U30014000002)

Data: 2018-02-21-LP110-CID180(1377)-peak40001.K15[c] 21 Feb 2018 11:48 Cal: 120817 6 Apr 2017 11:02 (CID of 1376.96)  
Shimadzu Biotech Axima QIT 2.9.1.20100121: Mode positive, Mid 750+, Power: 110

| Mass    | %Area  | %Total | Apex (mV) | Resolution | S / N | Flags |
|---------|--------|--------|-----------|------------|-------|-------|
| 550.03  | 5.55   | 3.41   | 0.22      | 0.00       | 0.00  | M     |
| 567.04  | 7.54   | 4.64   | 0.42      | 0.00       | 0.00  | M     |
| 670.98  | 10.93  | 6.73   | 0.53      | 0.00       | 0.00  | M     |
| 832.99  | 9.37   | 5.77   | 0.52      | 0.00       | 0.00  | M     |
| 851.01  | 3.85   | 2.37   | 0.27      | 0.00       | 0.00  | M     |
| 874.01  | 5.65   | 3.48   | 0.31      | 0.00       | 0.00  | M     |
| 1036.01 | 100.00 | 61.56  | 4.04      | 0.00       | 0.00  | M     |
| 1377.07 | 19.55  | 12.04  | 0.93      | 0.00       | 0.00  | M     |
