# Supplementary material for: Rapid chemical de-N-glycosylation and derivatization for liquid chromatography of immunoglobulin N-linked glycans
Source: PubMed Central journal article supplement (PMC5933716; doi:10.1371/journal.pone.0196800), 2018-05-03
Supplement: pone.0196800.s006.pdf [file pone.0196800.s006.pdf]

A

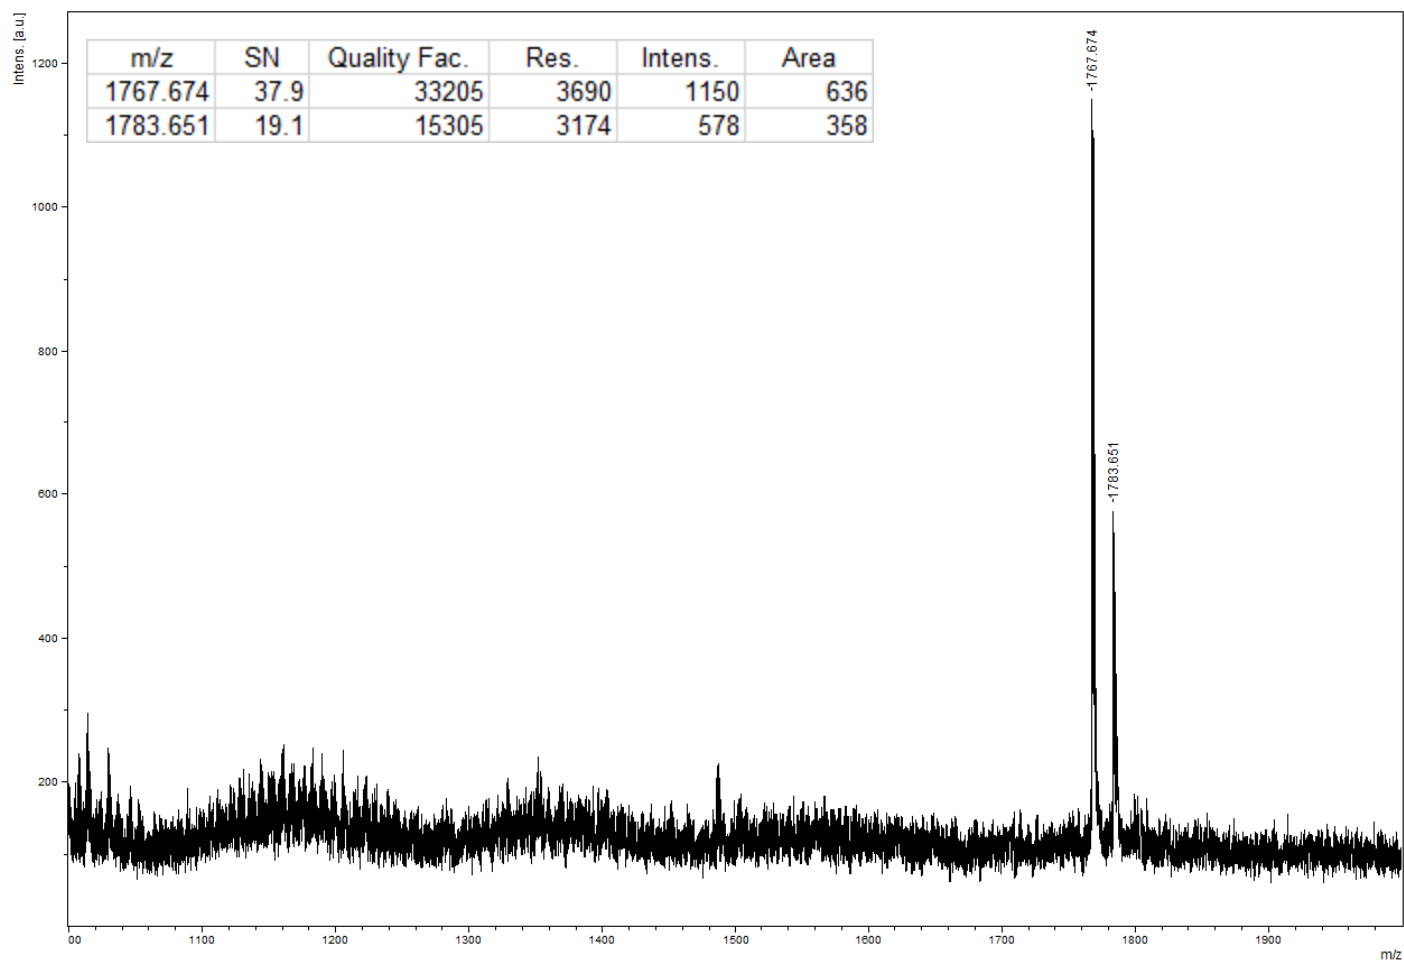

B

2.8.5.20090629ver.R04\_120615(S/N:U30014000002)

Data: 2018-0219-LP100-CID156(1767)-peak5ture0001.F15[c] 19 Feb 2018 15:18 Cal: 120817 6 Apr 2017 11:02 (CID of 1767).  
Shimadzu Biotech Axima QIT 2.9.1.20100121: Mode positive, Mid 750+, Power: 100  
%Int. 21 mV[sum= 12588 mV] Profiles 1-600 Unsmoothed

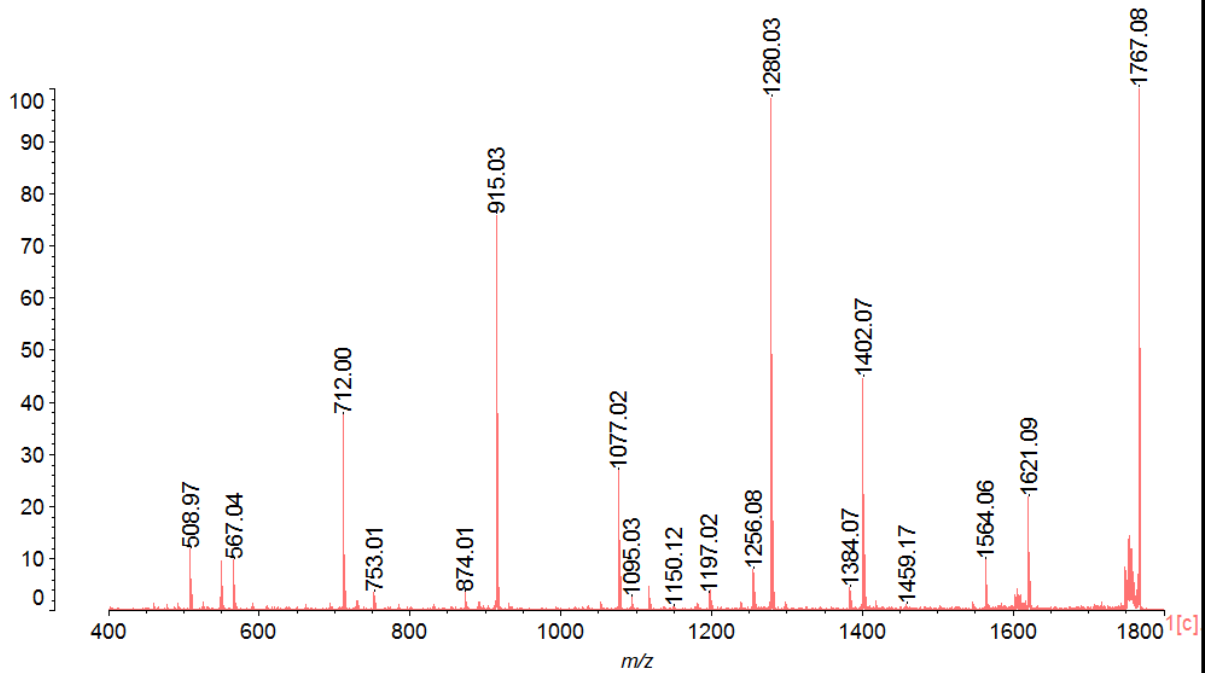

2.8.5.20090629ver.R04\_120615(S/N:U30014000002)

Data: 2018-0219-LP100-CID156(1767)-peak5ture0001.F15[c] 19 Feb 2018 15:18 Cal: 120817 6 Apr 2017 11:02 (CID of 1767).  
Shimadzu Biotech Axima QIT 2.9.1.20100121: Mode positive, Mid 750+, Power: 100

| Mass    | %Area  | %Total | Apex (mV) | Resolution | S / N | Flags |
|---------|--------|--------|-----------|------------|-------|-------|
| 508.97  | 9.53   | 2.03   | 2.44      | 0.00       | 0.00  | M     |
| 549.99  | 7.77   | 1.66   | 1.96      | 0.00       | 0.00  | M     |
| 567.04  | 7.87   | 1.68   | 2.00      | 0.00       | 0.00  | M     |
| 712.00  | 33.92  | 7.22   | 7.86      | 0.00       | 0.00  | M     |
| 730.01  | 0.64   | 0.14   | 0.37      | 0.00       | 0.00  | M     |
| 753.01  | 2.84   | 0.60   | 0.71      | 0.00       | 0.00  | M     |
| 874.01  | 3.04   | 0.65   | 0.72      | 0.00       | 0.00  | M     |
| 915.03  | 79.20  | 16.87  | 15.90     | 0.00       | 0.00  | M     |
| 1077.02 | 25.17  | 5.36   | 5.61      | 0.00       | 0.00  | M     |
| 1095.03 | 2.31   | 0.49   | 0.52      | 0.00       | 0.00  | M     |
| 1118.02 | 3.74   | 0.80   | 0.95      | 0.00       | 0.00  | M     |
| 1197.02 | 2.66   | 0.57   | 0.65      | 0.00       | 0.00  | M     |
| 1256.08 | 8.63   | 1.84   | 1.61      | 0.00       | 0.00  | M     |
| 1280.03 | 100.00 | 21.30  | 20.59     | 0.00       | 0.00  | M     |
| 1384.07 | 3.35   | 0.71   | 0.91      | 0.00       | 0.00  | M     |
| 1402.07 | 54.00  | 11.50  | 9.33      | 0.00       | 0.00  | M     |
| 1418.02 | 0.93   | 0.20   | 0.37      | 0.00       | 0.00  | M     |
| 1564.06 | 10.81  | 2.30   | 2.01      | 0.00       | 0.00  | M     |
| 1621.09 | 23.21  | 4.94   | 4.54      | 0.00       | 0.00  | M     |
| 1767.08 | 89.89  | 19.15  | 20.98     | 0.00       | 0.00  | M     |
