# Supplementary material for: Rapid chemical de-N-glycosylation and derivatization for liquid chromatography of immunoglobulin N-linked glycans
Source: PubMed Central journal article supplement (PMC5933716; doi:10.1371/journal.pone.0196800), 2018-05-03
Supplement: pone.0196800.s007.pdf [file pone.0196800.s007.pdf]

A

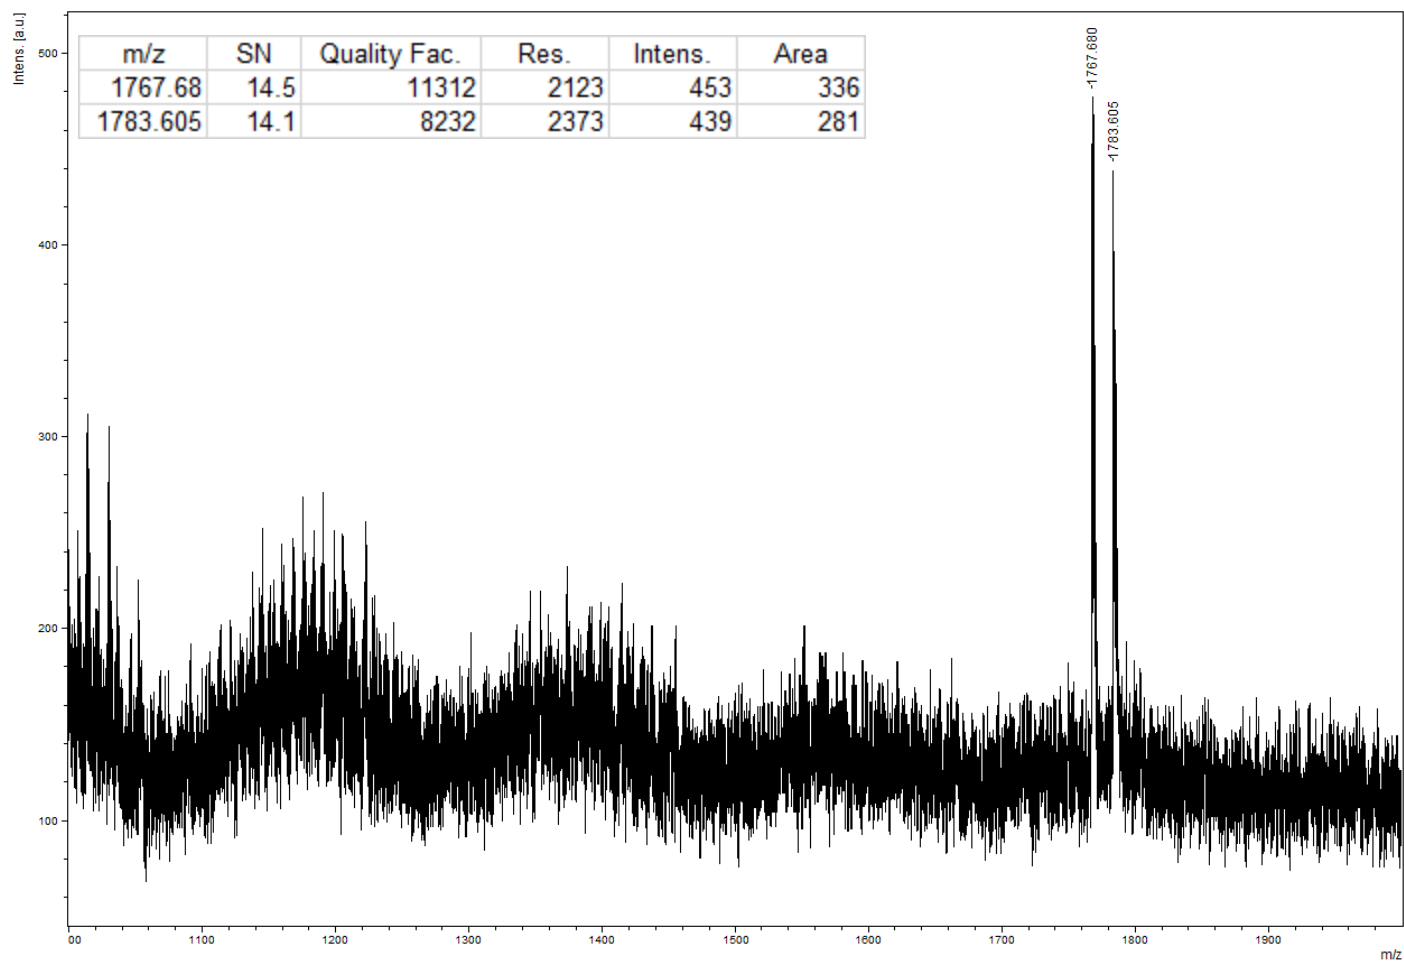

B

2.8.5.20090629ver.R04\_120615(S/N:U30014000002)

Data: 2018-0219-LP100-CID156(1767)-peak60001.G17[c] 19 Feb 2018 15:28 Cal: 120817 6 Apr 2017 11:02 (CID of 1767.11)  
Shimadzu Biotech Axima QIT 2.9.1.20100121: Mode positive, Mid 750+, Power: 100  
%Int. 3.7 mV[sum= 2212 mV] Profiles 1-600 Unsmoothed

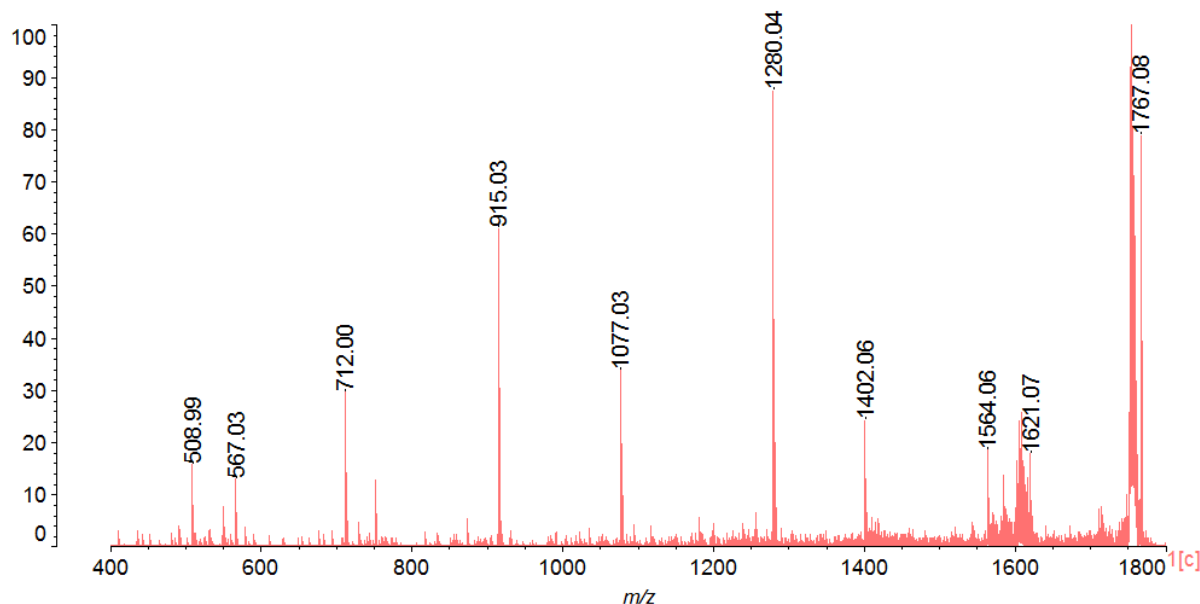

2.8.5.20090629ver.R04\_120615(S/N:U30014000002)

Data: 2018-0219-LP100-CID156(1767)-peak60001.G17[c] 19 Feb 2018 15:28 Cal: 120817 6 Apr 2017 11:02 (CID of 1767.11)  
Shimadzu Biotech Axima QIT 2.9.1.20100121: Mode positive, Mid 750+, Power: 100

| Mass    | %Area  | %Total | Apex (mV) | Resolution | S / N | Flags |
|---------|--------|--------|-----------|------------|-------|-------|
| 508.99  | 8.97   | 2.36   | 0.58      | 0.00       | 0.00  | M     |
| 550.00  | 4.74   | 1.25   | 0.27      | 0.00       | 0.00  | M     |
| 567.03  | 9.60   | 2.52   | 0.48      | 0.00       | 0.00  | M     |
| 712.00  | 24.68  | 6.49   | 1.09      | 0.00       | 0.00  | M     |
| 753.02  | 7.79   | 2.05   | 0.46      | 0.00       | 0.00  | M     |
| 915.03  | 45.52  | 11.97  | 2.25      | 0.00       | 0.00  | M     |
| 1077.03 | 37.25  | 9.79   | 1.24      | 0.00       | 0.00  | M     |
| 1280.04 | 70.87  | 18.63  | 3.22      | 0.00       | 0.00  | M     |
| 1402.06 | 22.70  | 5.97   | 0.89      | 0.00       | 0.00  | M     |
| 1564.06 | 16.77  | 4.41   | 0.68      | 0.00       | 0.00  | M     |
| 1585.29 | 8.44   | 2.22   | 0.50      | 0.00       | 0.00  | M     |
| 1621.07 | 23.10  | 6.07   | 0.65      | 0.00       | 0.00  | M     |
| 1767.08 | 100.00 | 26.29  | 2.90      | 0.00       | 0.00  | M     |
