# Supplementary material for: Rapid chemical de-N-glycosylation and derivatization for liquid chromatography of immunoglobulin N-linked glycans
Source: PubMed Central journal article supplement (PMC5933716; doi:10.1371/journal.pone.0196800), 2018-05-03
Supplement: pone.0196800.s008.pdf [file pone.0196800.s008.pdf]

A

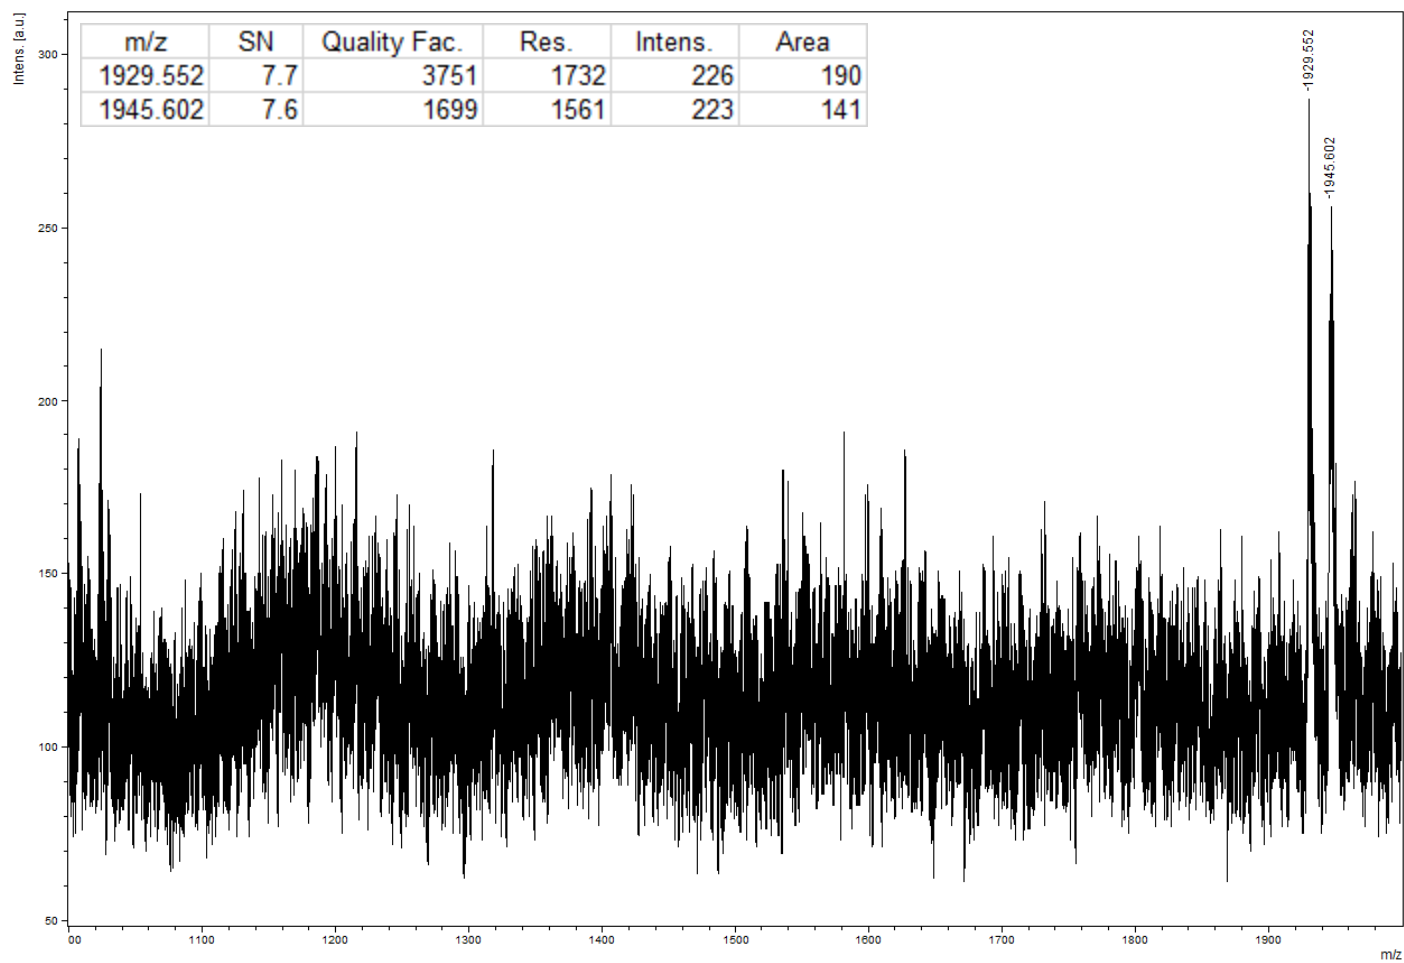

B

2.8.5.20090629ver.R04\_120615(S/N:U30014000002)

Data: 2018-0219-LP115-CID156(1929)-peak70001.H15[c] 19 Feb 2018 16:15 Cal: 120817 6 Apr 2017 11:02 (CID of 1929.27)  
Shimadzu Biotech Axima QIT 2.9.1.20100121: Mode positive, Mid 750+, Power: 115  
%Int. 2.9 mV[sum= 1749 mV] Profiles 1-600 Unsmoothed

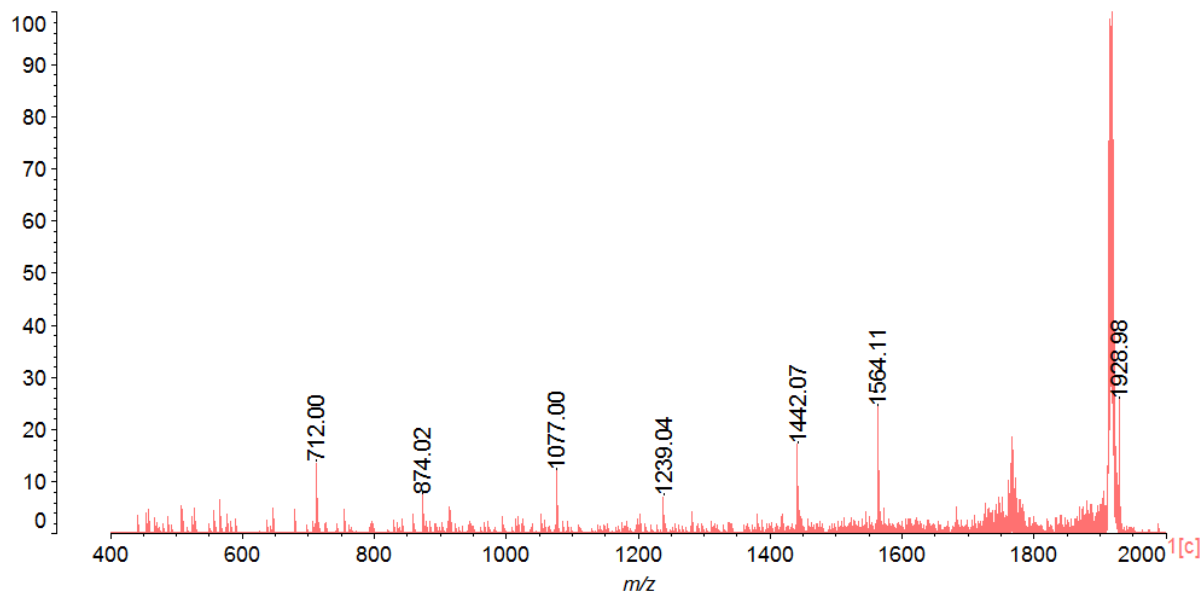

2.8.5.20090629ver.R04\_120615(S/N:U30014000002)

Data: 2018-0219-LP115-CID156(1929)-peak70001.H15[c] 19 Feb 2018 16:15 Cal: 120817 6 Apr 2017 11:02 (CID of 1929.27)  
Shimadzu Biotech Axima QIT 2.9.1.20100121: Mode positive, Mid 750+, Power: 115

| Mass    | %Area  | %Total | Apex (mV) | Resolution | S / N | Flags |
|---------|--------|--------|-----------|------------|-------|-------|
| 712.00  | 29.73  | 8.86   | 0.39      | 0.00       | 0.00  | M     |
| 874.02  | 22.29  | 6.64   | 0.22      | 0.00       | 0.00  | M     |
| 915.04  | 12.64  | 3.77   | 0.14      | 0.00       | 0.00  | M     |
| 1077.00 | 49.32  | 14.69  | 0.35      | 0.00       | 0.00  | M     |
| 1239.04 | 25.29  | 7.53   | 0.20      | 0.00       | 0.00  | M     |
| 1442.07 | 73.43  | 21.88  | 0.50      | 0.00       | 0.00  | M     |
| 1564.11 | 100.00 | 29.79  | 0.71      | 0.00       | 0.00  | M     |
| 1928.98 | 22.97  | 6.84   | 0.75      | 0.00       | 0.00  | M     |
