# Supplementary material for: Rapid chemical de-N-glycosylation and derivatization for liquid chromatography of immunoglobulin N-linked glycans
Source: PubMed Central journal article supplement (PMC5933716; doi:10.1371/journal.pone.0196800), 2018-05-03

A

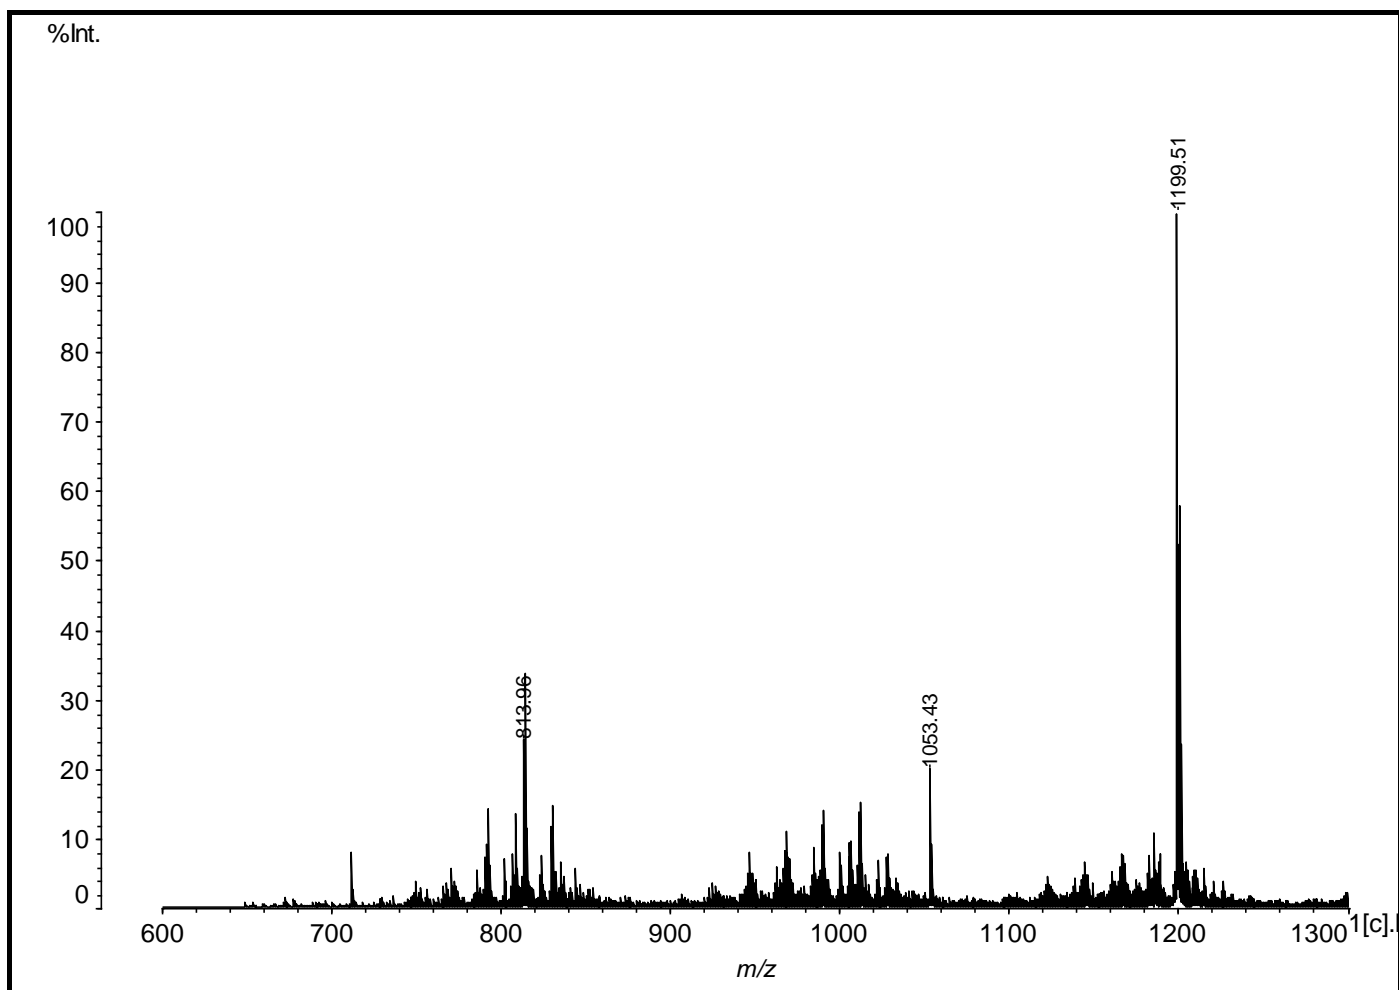

B

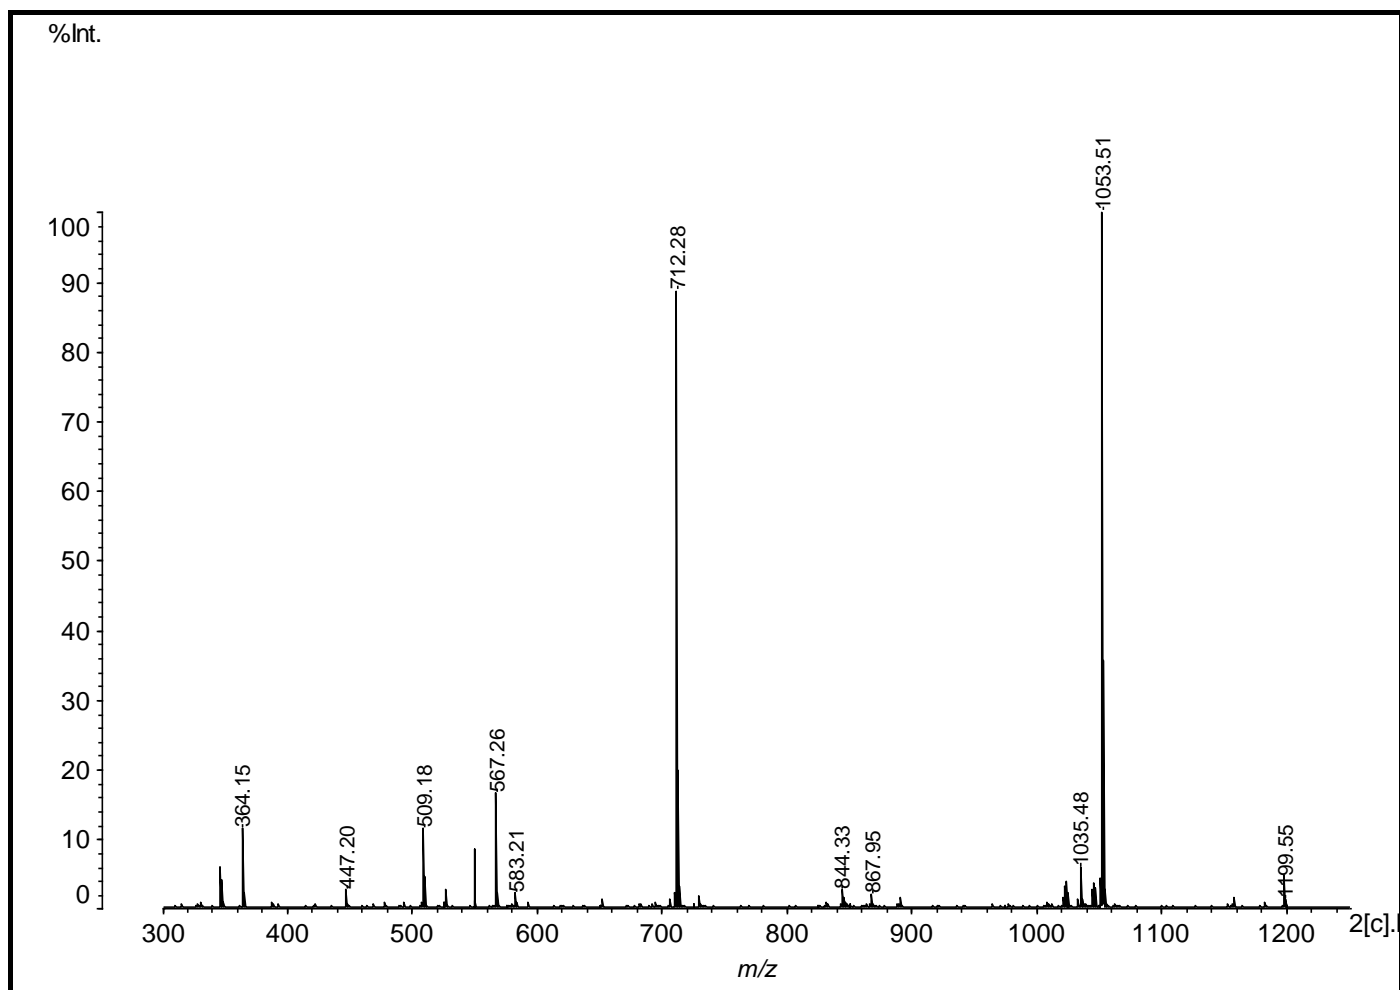

Supplement: pone.0196800.s019.pdf [file pone.0196800.s019.pdf]
